# Supplementary material for: A near-complete genome assembly of the allotetrapolyploid Cenchrus fungigraminus (JUJUNCAO) provides insights into its evolution and C4 photosynthesis
Source: PubMed Central journal article supplement — Plant Commun. 2023 Jun 3;4(5):100633. doi: 10.1016/j.xplc.2023.100633 (PMC10504591; doi:10.1016/j.xplc.2023.100633), 2023-06-03
Supplement: mmc1.pdf [file mmc1.pdf]

Supplemental information

**A near-complete genome assembly of the allotetraploid *Cenchrus fungigraminus* (JUJUNCAO) provides insights into its evolution and C4 photosynthesis**

**Huakun Zheng, Baiyu Wang, Xiuting Hua, Ruiting Gao, Yuhao Wang, Zixin Zhang, Yixing Zhang, Jing Mei, Yongji Huang, Yumin Huang, Hui Lin, Xingtian Zhang, Dongmei Lin, Siren Lan, Zhongjian Liu, Guodong Lu, Zonghua Wang, Ray Ming, Jisen Zhang, and Zhanxi Lin**

**A near complete allotetraploid genome provides insight into the evolution and C<sub>4</sub> photosynthesis characteristics of *Cenchrus fungigraminus* (JUNCAO)**

Huakun Zheng<sup>1,#</sup>, Baiyu Wang<sup>2,3,#</sup>, Xiuting, Hua<sup>2,#</sup>, Ruiting Gao<sup>2,#</sup>, Yuhao Wang<sup>3,#</sup>, Zixin Zhang<sup>1</sup>, Yixing Zhang<sup>3</sup>, Jing Mei<sup>3</sup>, Yongji Huang<sup>4</sup>, Yumin Huang<sup>3</sup>, Hui Lin<sup>1</sup>, Xingtian Zhang<sup>3</sup>, Dongmei Lin<sup>1</sup>, Siren Lan<sup>1</sup>, Zhongjian Liu<sup>1</sup>, Guodong Lu<sup>1</sup>, Zonghua Wang<sup>1,\*</sup>, Ray Ming<sup>3,\*</sup>, Jisen Zhang<sup>2,\*</sup>, Zhanxi Lin<sup>1,\*</sup>

<sup>1</sup>National Engineering Research Center of JUNCAO Technology, College of Life Science, Fujian Agriculture and Forestry University, Fuzhou 350002, China.

<sup>2</sup> State Key Laboratory for Conservation and Utilization of Subtropical Agro-bioresources, Guangxi Key Laboratory of Sugarcane Biology, Guangxi University, Guangxi 530004, China.

<sup>3</sup> Center for Genomics, Fujian Provincial Key Laboratory of Haixia Applied Plant Systems Biology, Key Laboratory of Genetics, Breeding and Multiple Utilization of Corps, Ministry of Education, Fujian Agriculture and Forestry University, Fuzhou 350002, China.

<sup>4</sup>Fuzhou Institute of Oceanography, Minjiang University, Fuzhou 350108, China.

#These authors contributed to this work equally.

\*To whom correspondence should be addressed. Email:

lzxjuncao@163.com ; zjisen@fafu.edu.cn; rayming@illinois.edu;  
zonghuaw@163.com.

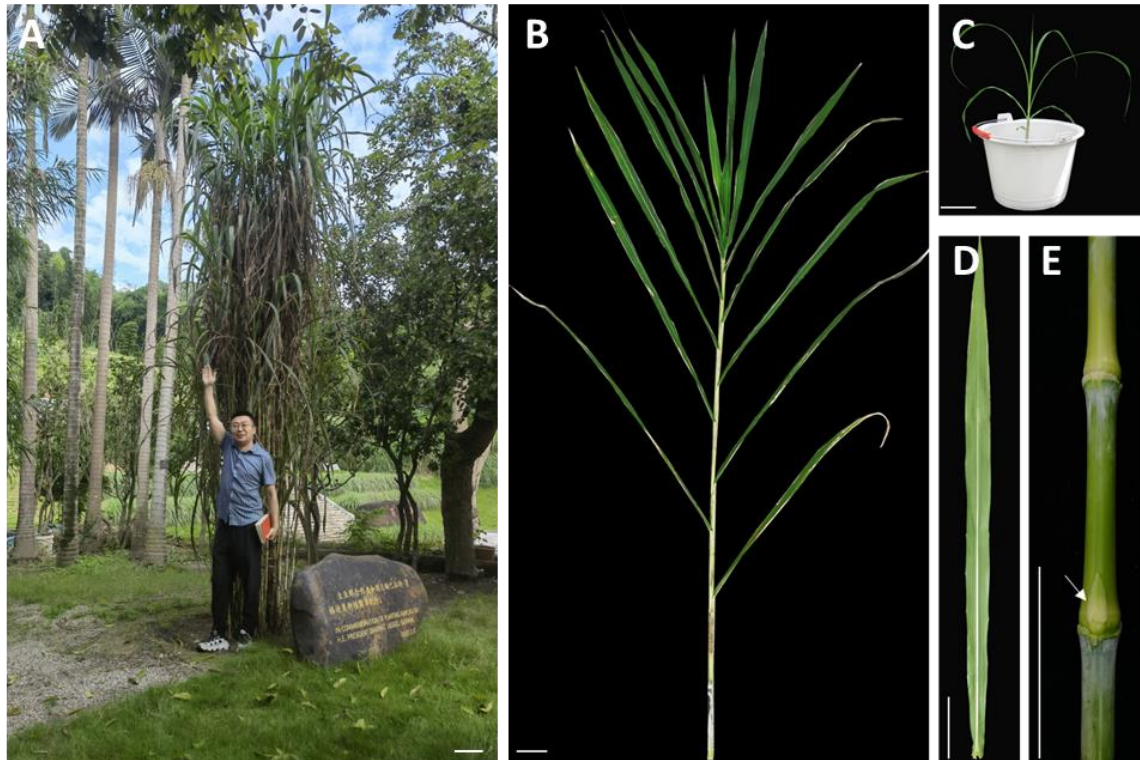

**Figure S1. *Cenchrus fungigraminus* (JUJUNCAO).**

**(A)** The JUJUNCAO plants in the field. Scale bar: 30 cm.

**(B)** Model of JUJUNCAO. Scale bar: 10 cm.

**(C-E)** Seedling (C), leaf (D) and stem (E) of JUJUNCAO. The arrow in (E) indicates the bud on a stem. Scale bar: 10 cm.

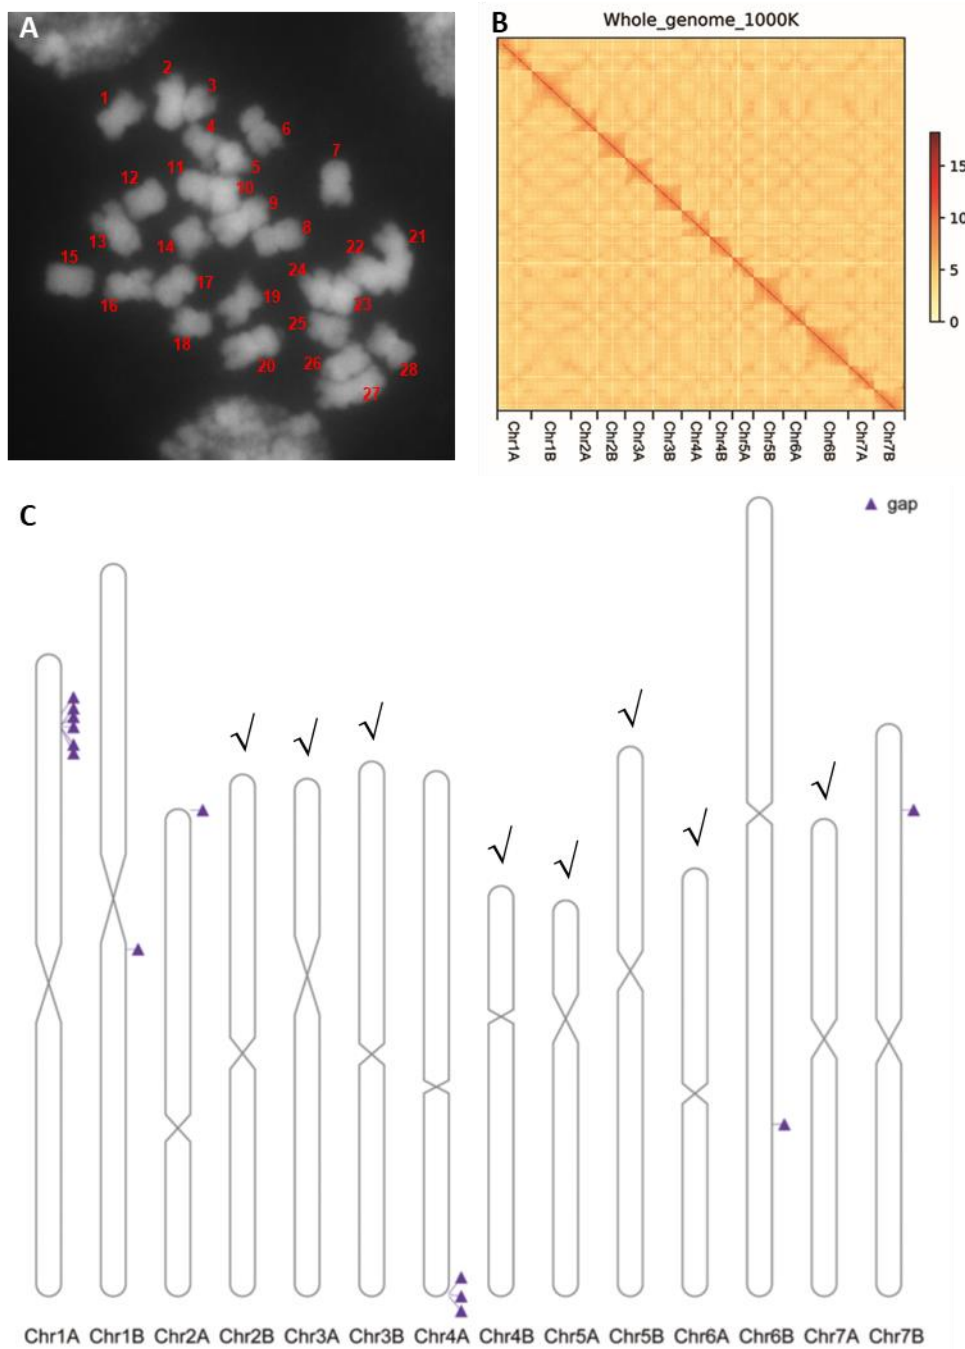

**Figure S2. The JUJUNCAO genome consists of 14 chromosomes.**

**(A)** The microscopic karyotype of JUJUNCAO.

**(B)** The Hi-C chromatin interaction map for the 14 pseudo-chromosome of JUJUNCAO genome.

**(C)** The 14 assembled chromosomes of the JUJUNCAO genome. “✓” indicates the telomere to telomere chromosomes; “▲” indicates the gap on assembled chromosomes.

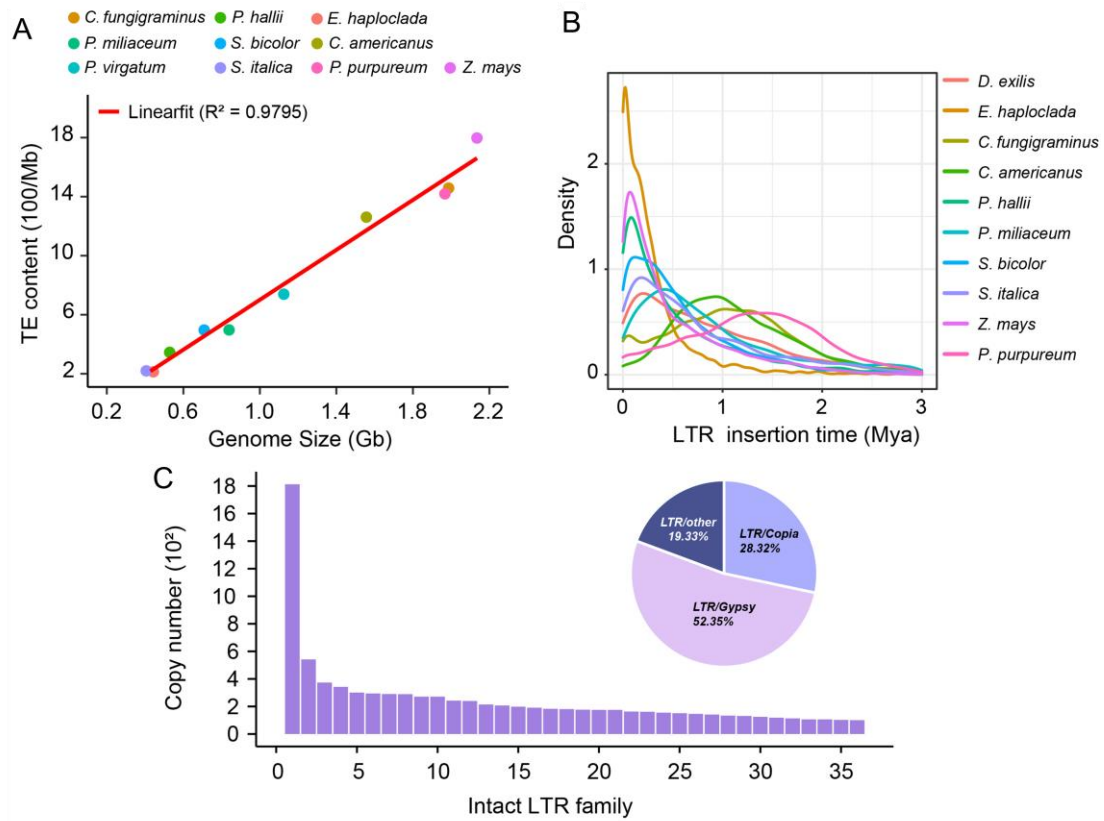

**Figure S3. Characteristics of TE sequences in JUJUNCAO genome.**

**(A)** Genome size expansion is highly correlated with TE amplification bursts ( $R^2 = 0.9795$ ). The red line shows the linear relationship between genome size and TE content.

**(B)** Intact LTR retrotransposon insertion time of *D. exilis*, *E. haploclada*, *C. fungigraminus*, *C. americanus*, *P. hallii*, *P. miliaceum*, *S. bicolor*, *S. italica*, *Z. mays*, *P. purpureum*, X-axis represents LTR retrotransposon insertion time, Y-axis represents density.

**(C)** Classification of intact LTR retrotransposons in the JUJUNCAO genome, LTR families with more than 100 copies are shown.

**A**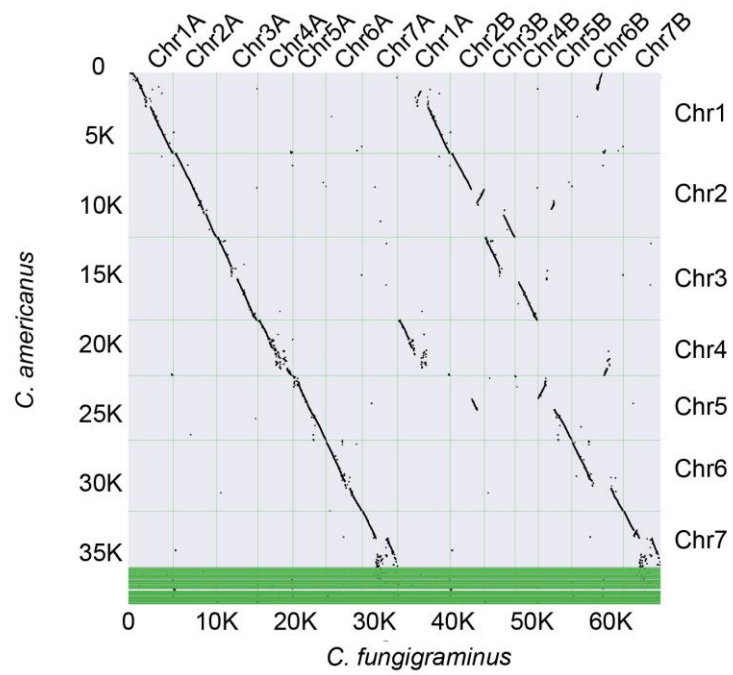**B**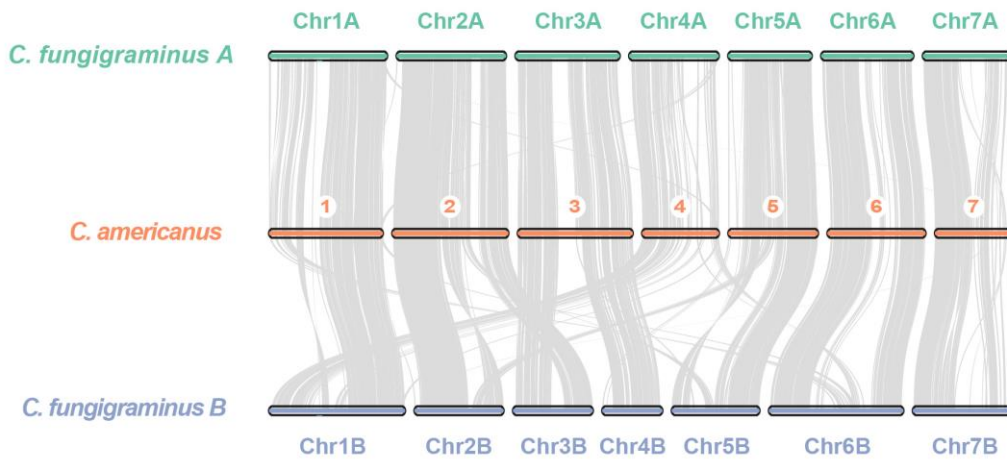

**Figure S4. Comparative genomic analysis of the A and B subgenomes of *C. fungigraminus* and *C. americanus*.**

(A) Dot-plot of alignments.

(B) Syntenic blocks

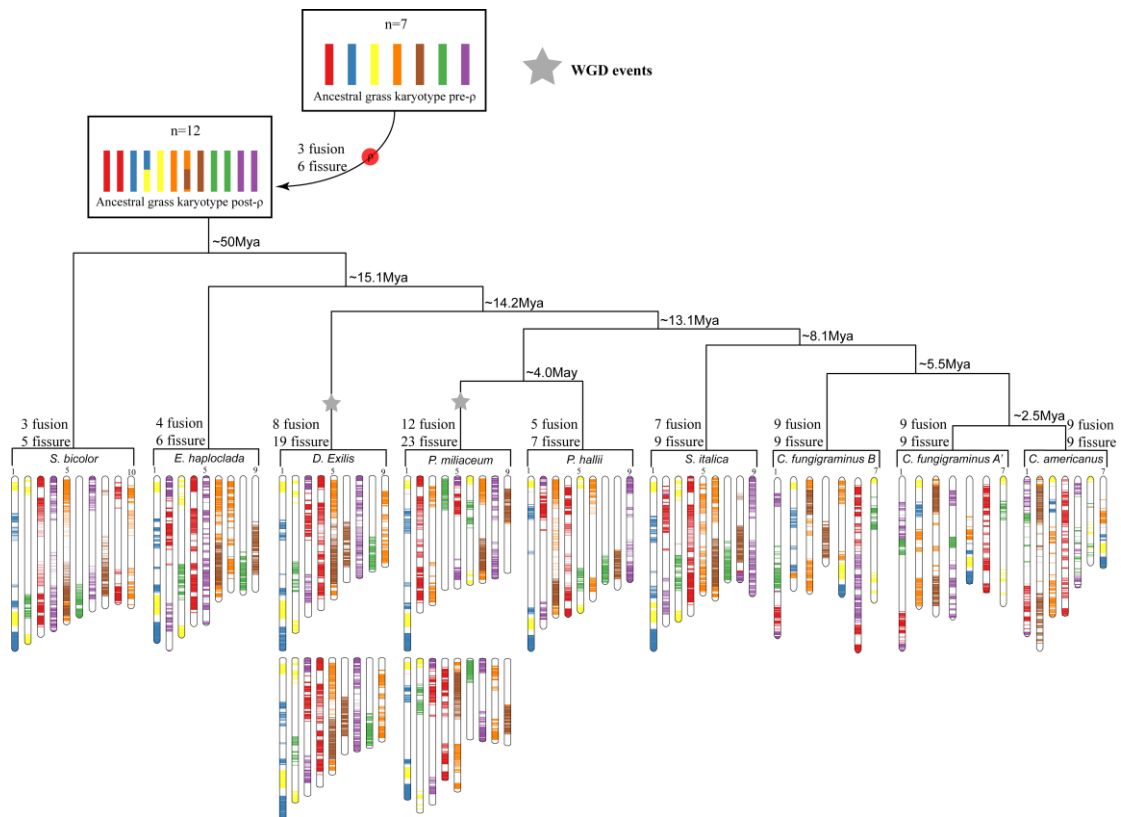

**Figure S5. Chromosome evolution of JUJUNCAO and species of Panicoideae.** Evolutionary scenario of chromosomes in *Z. mays*, *S. bicolor*, *E. haploclad*, *D. exilis*, *P. miliaceum*, *P. hallii*, *S. italica*, *C. americanus*, *C. fungigraminus* A and B, from the seven chromosomes of ancestral grass karyotype (AGK) pre-p and the 12 protochromosomes of the AGK post-p. Polyploidization events are indicated by stars, along with shuffling events (fusions and fissions).

**A**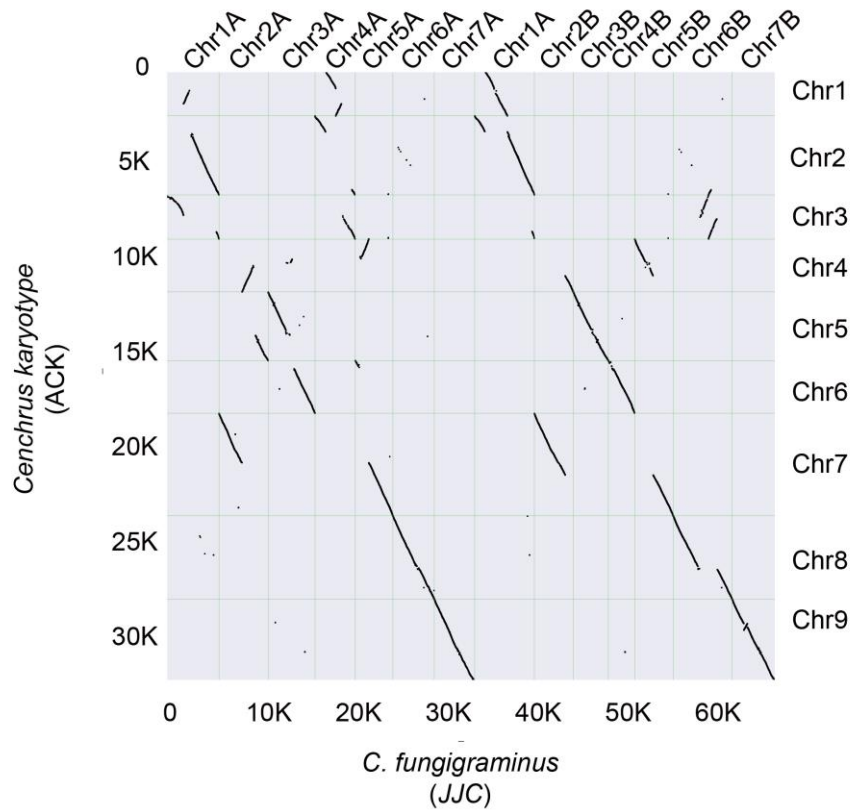**B**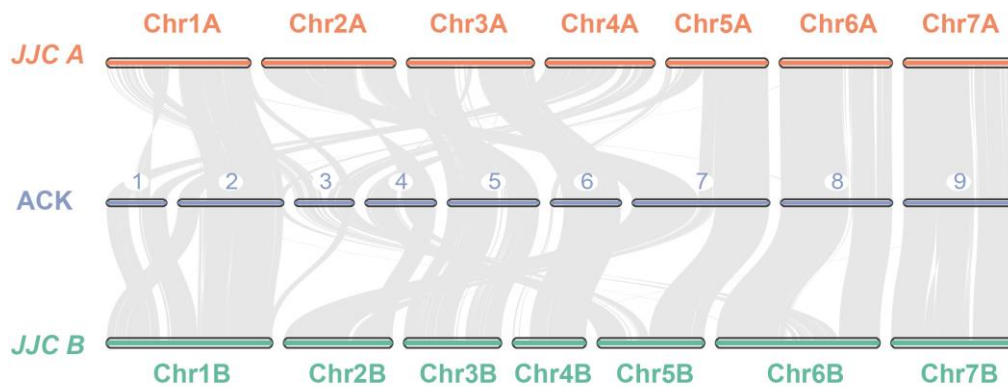

**Figure S6. Comparative genomic analysis of the A and B subgenomes of *C. fungigraminus* and ancestral *Cenchrus* karyotype (ACK).**

(A) Dot-plot of alignments.

(B) Syntenic blocks



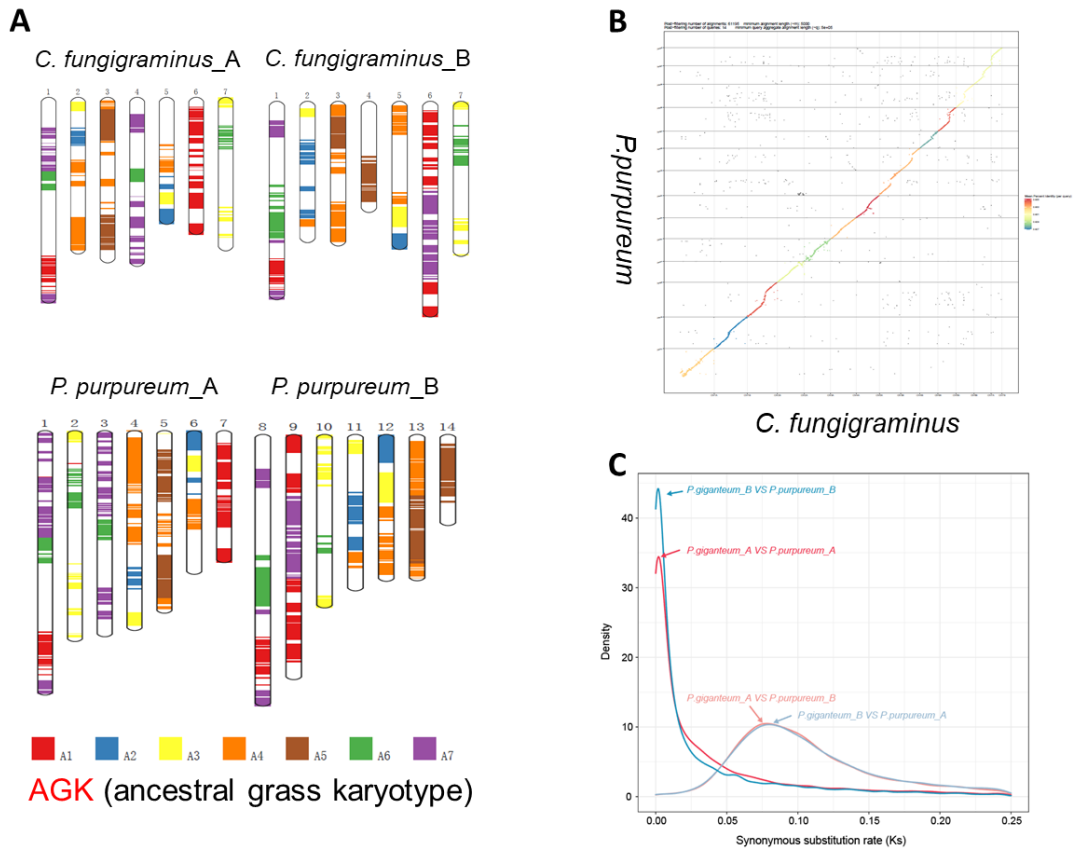

**Figure S7. The chromosome structure and evolution between JUJUNCAO and *P. purpureum*.**

(A) Comparison of chromosome structure between JUJUNCAO and *P. purpureum*.

(B) Graphical alignment of JUJUNCAO chromosomes with *P. purpureum* chromosomes.

(C) Distributions of Ks between JUJUNCAO and *P. purpureum*.

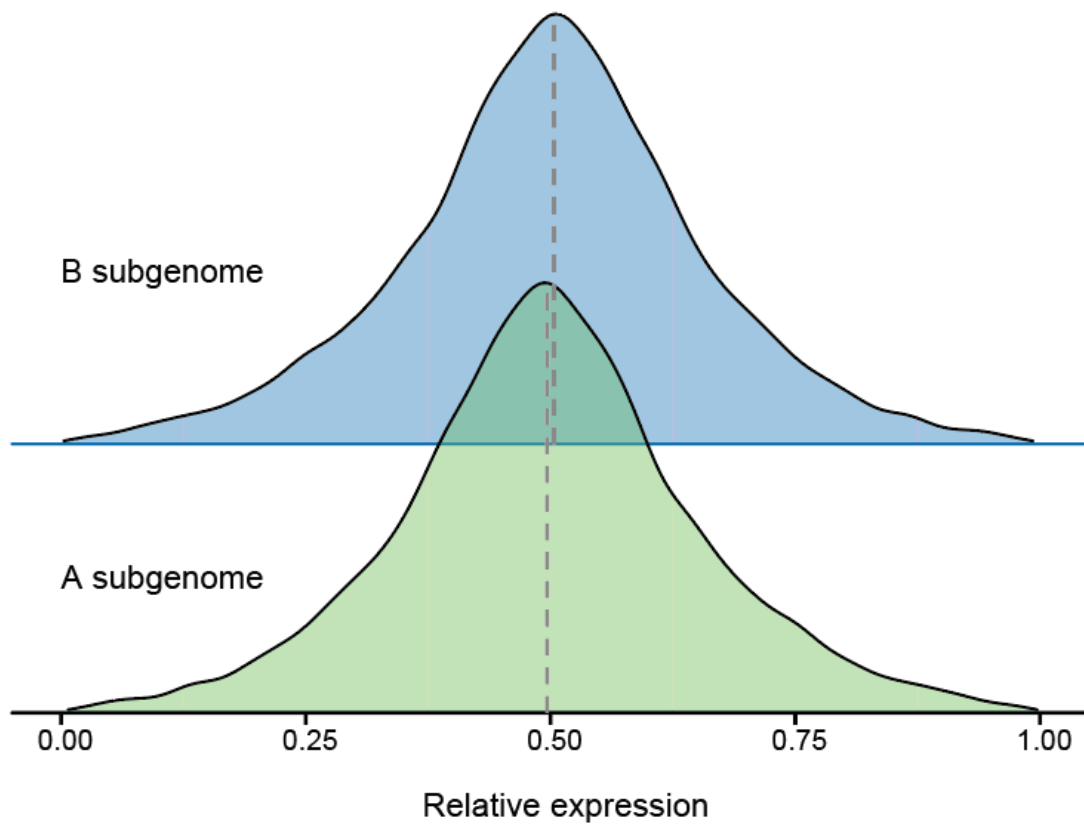

**Figure S8. Comparison of the overall expression level and natural selection feature between the two subgenomes.** The overall expression level between the two subgenomes of JUJUNCAO.

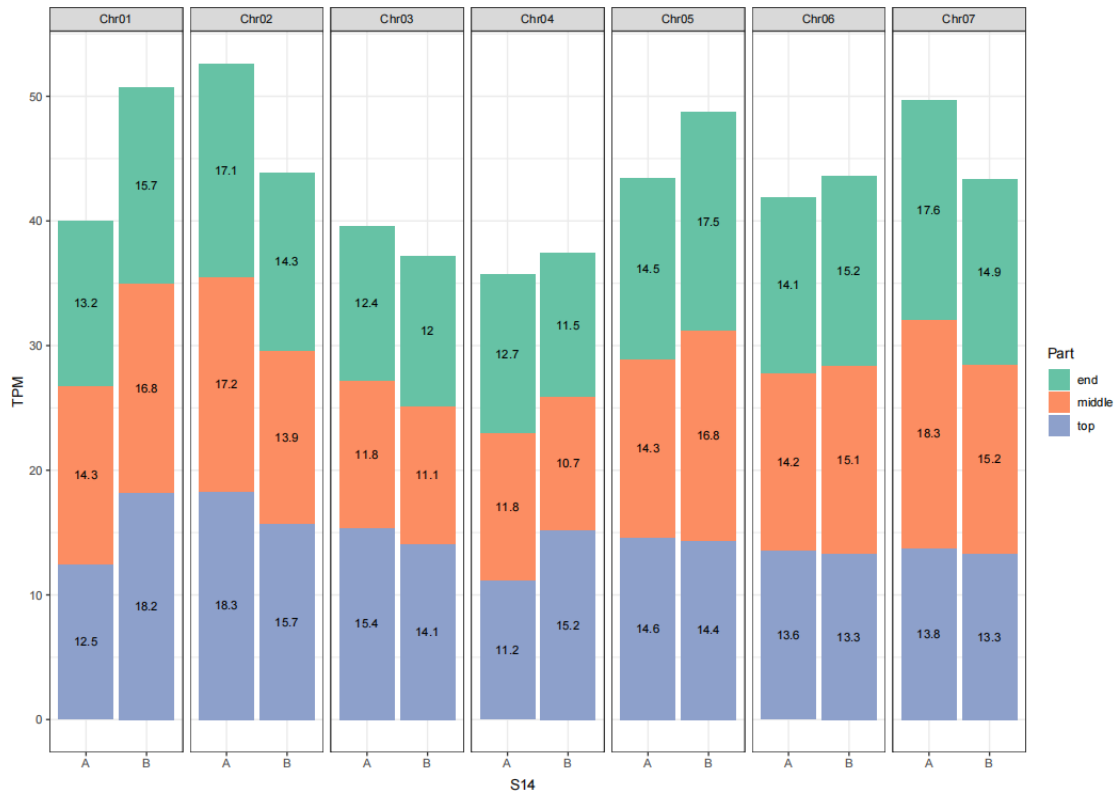

**Figure S9. The distribution of differentially expressed homeologous genes between A and B subgenomes. TPM (Transcript per million).**

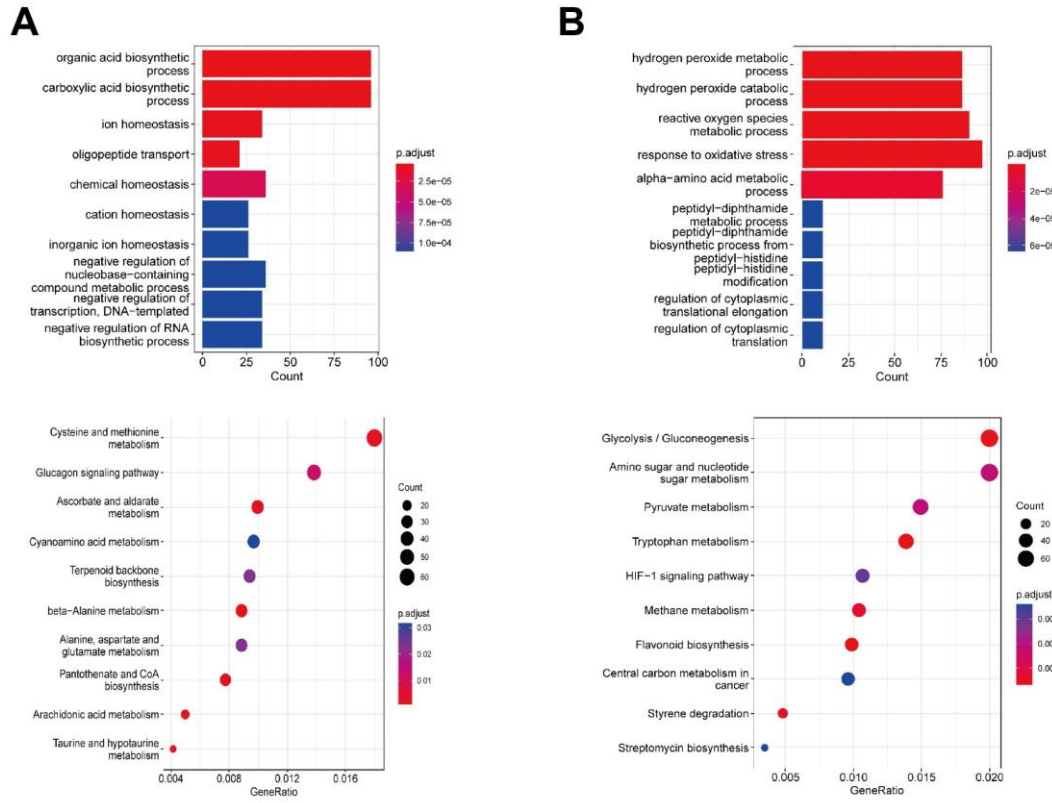

**Figure S10. GO (top) and KEGG (bottom) enrichment of subgenome A-biased genes (A) and subgenome B-biased genes (B).**

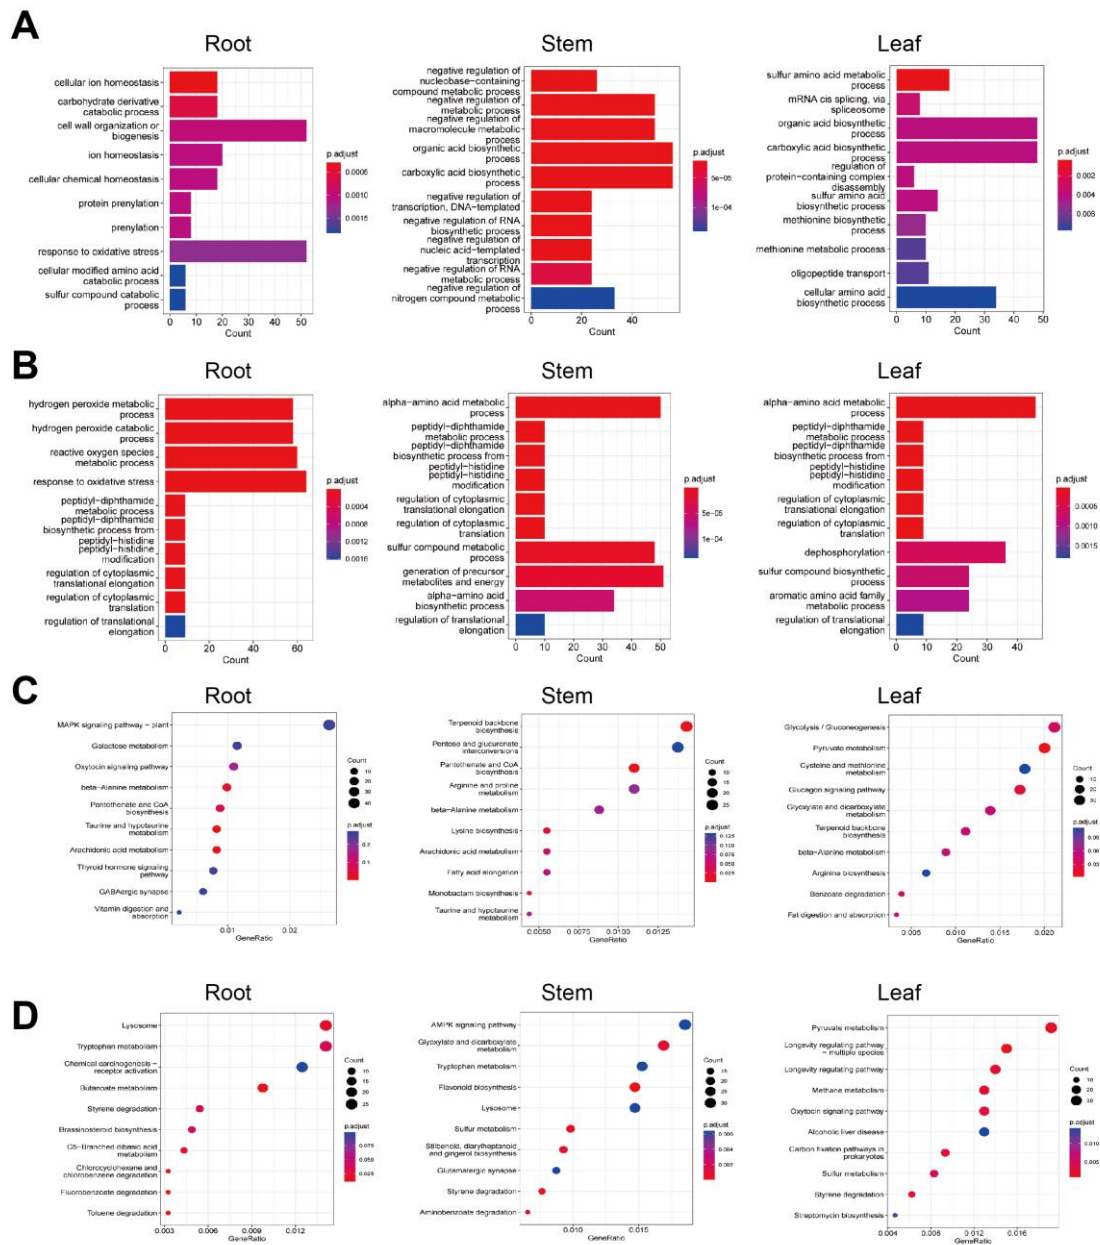

**Figure S11. GO (A,B) and KEGG (C,D) enrichment of A subgenome-biased genes (A,C) and B subgenome biased genes (B,D).**

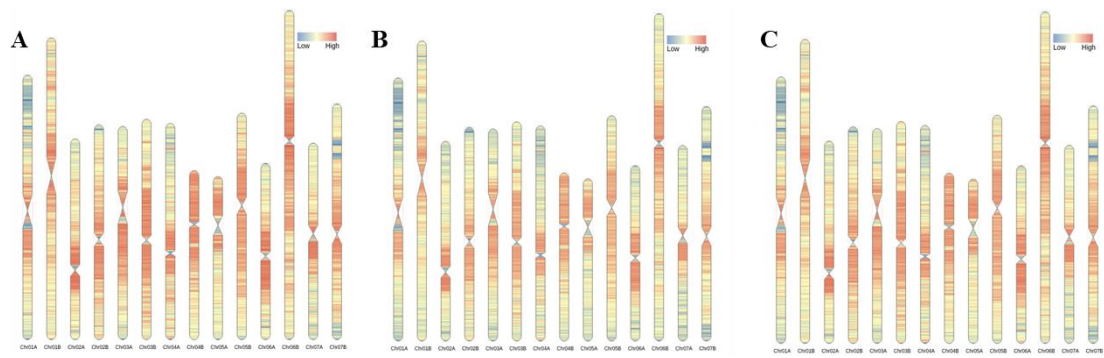

**Figure S12. Distribution of methylation through the chromosomes from different tissues**

- (A) The distribution of all methylation sites on chromosomes in the leaf.
- (B) The distribution of all methylation sites on chromosomes in the stem.
- (C) The distribution of all methylation sites on chromosomes in the root.

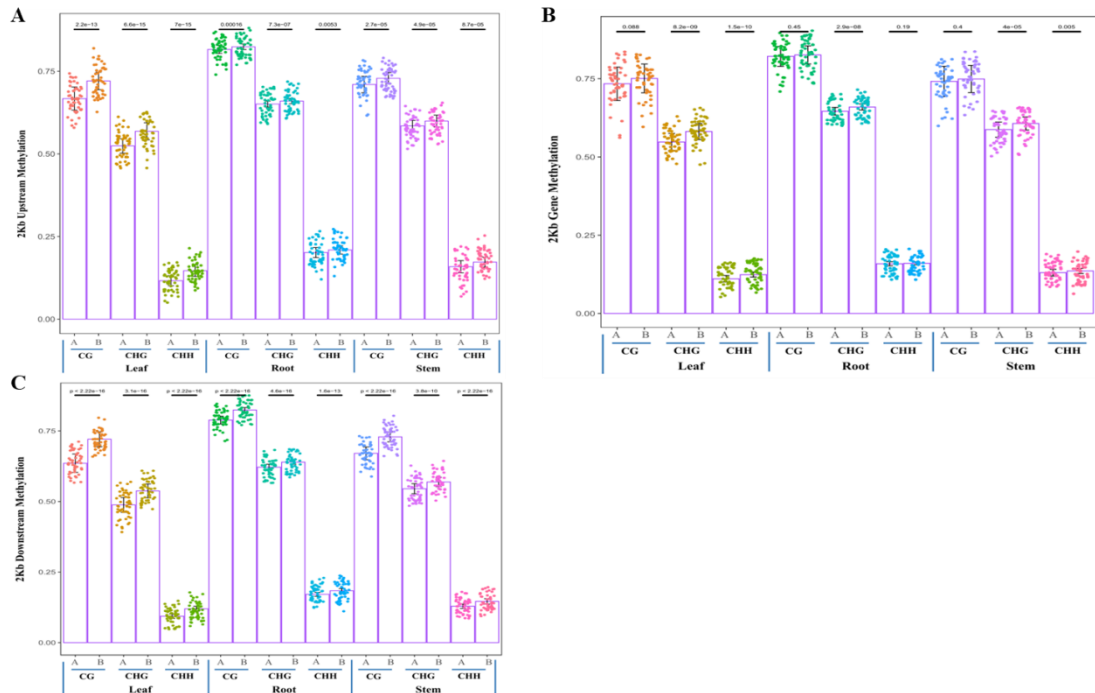

**Figure S13. The comparison of different methylation types of subgenomes A and B in different tissues.** The 2 Kb upstream, gene-body and 2 Kb downstream of A and B subgenomic genes were divided into 50 bins on average. Each point represents the average methylation ratio in a bin.

(A) Comparison of 2 Kb upstream methylation ratio of the genes of A and B subgenomes.

(B) Comparison of gene-body methylation ratio of the genes of A and B subgenomes.

(C) Comparison of 2 Kb downstream methylation ratio of the genes of A and B subgenomes.

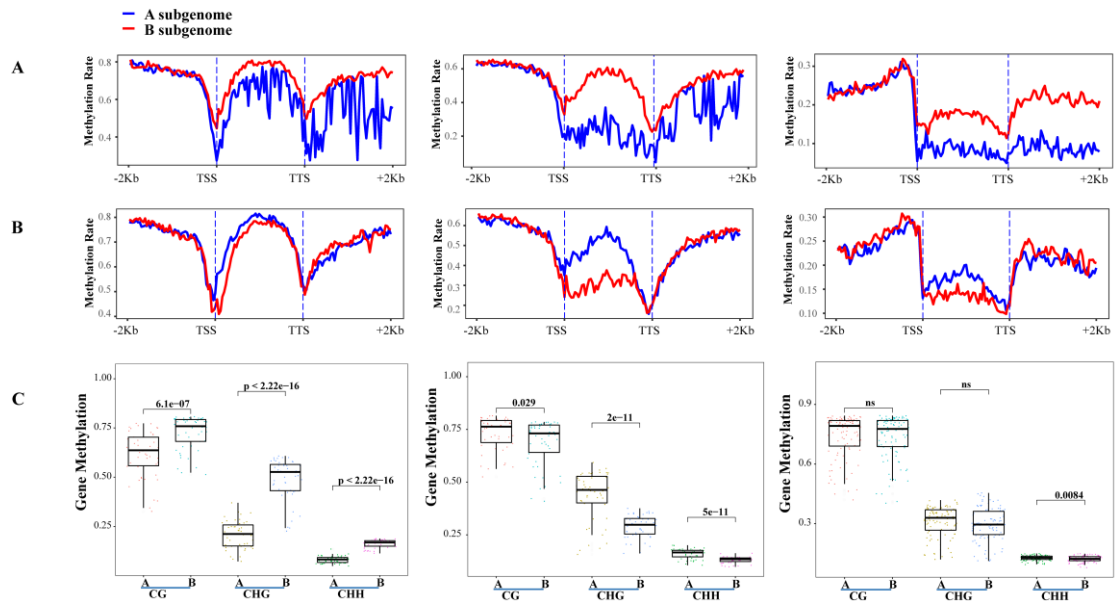

**Figure S14. DNA methylation divergence of the allotetraploid in the leaf.**

(A) The methylation rates of subgenome A-biased homeologous gene pairs (Fold>2) between the two subgenomes in the leaf.

(B) The methylation rates of subgenome B-biased homeologous gene pairs (Fold>2) between the two subgenomes in the leaf.

(C) Comparison of methylation rate in gene-body of A and B subgenomes in the leaf. The left panel shows the methylation rate of subgenome A-biased homeologous gene pairs between the two subgenomes (fold >2); The middle panel shows the methylation rate of subgenome B-biased homeologous gene pairs between the two subgenomes; The right panel shows the methylation rate of inconspicuous differentially expressed gene pairs (with 0-2 times changes) from the two subgenomes.



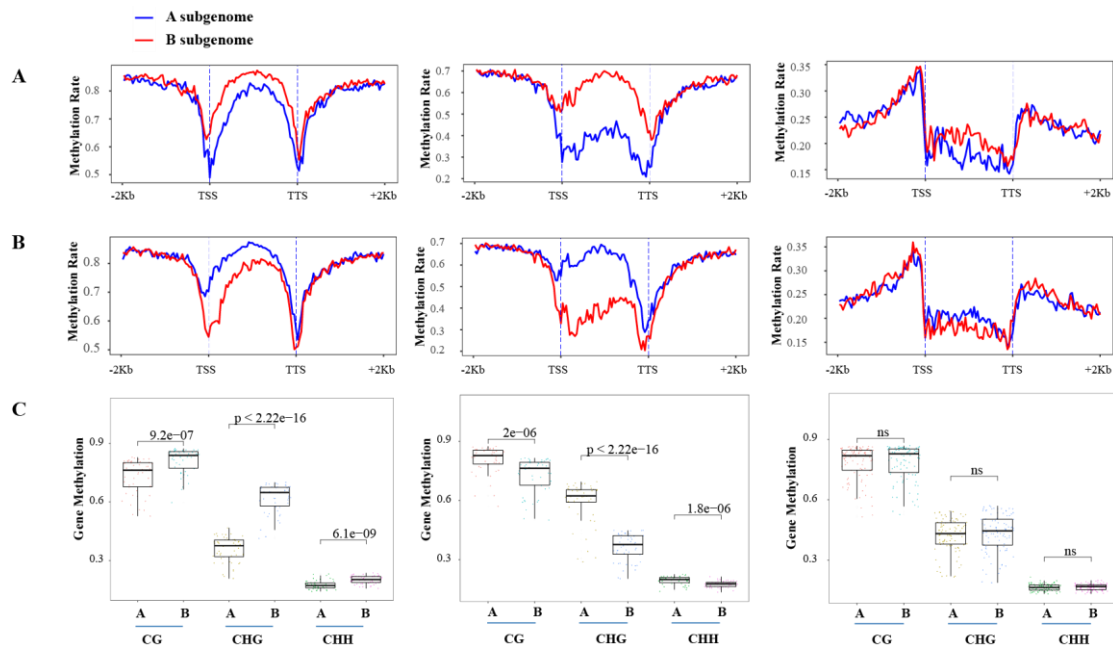

**Figure S15. DNA methylation divergence of the allotetraploid in the root.**  
 (A) The methylation rates of subgenome A-biased homeologous gene pairs (Fold>2) between the two subgenomes in the root.  
 (B) The methylation rates of subgenome B-biased homeologous gene pairs (Fold>2) between the two subgenomes in the root  
 (C) Comparison of methylation rate in gene-body of A and B subgenomes in the root. The left panel shows the methylation rate of subgenome A-biased homeologous gene pairs between the two subgenomes (fold >2); The middle panel shows the methylation rate of subgenome B-biased homeologous gene pairs between the two subgenomes; The right panel shows the methylation rate of inconspicuous differentially expressed gene pairs (with 0-2 times changes) from the two subgenomes.

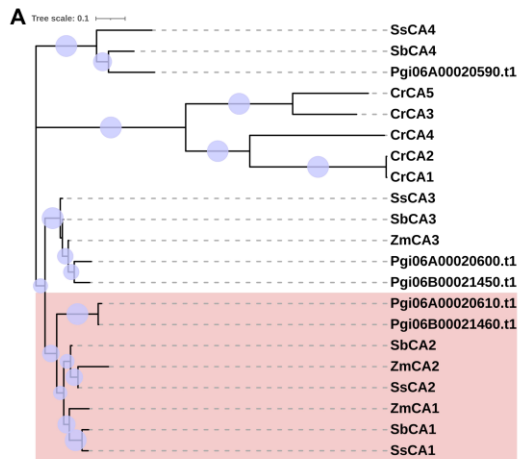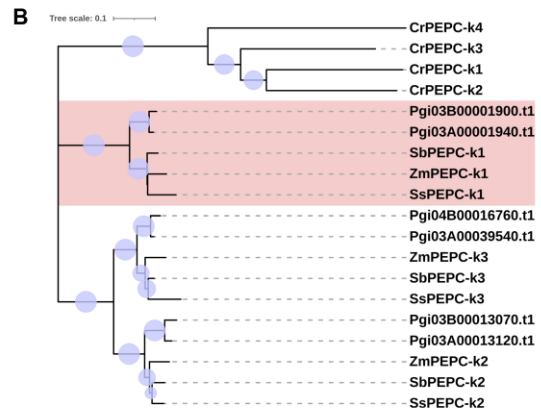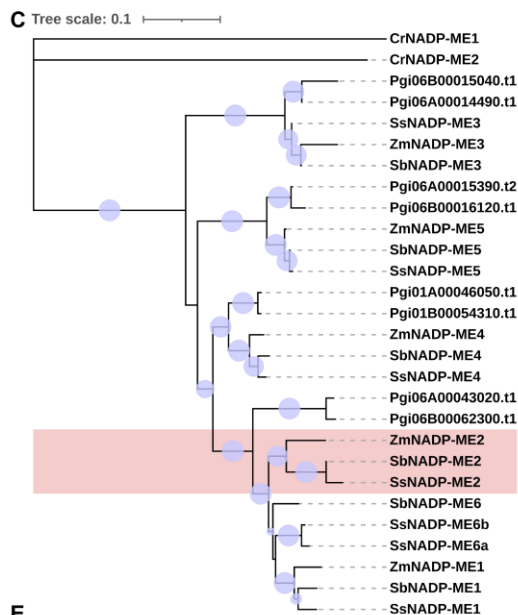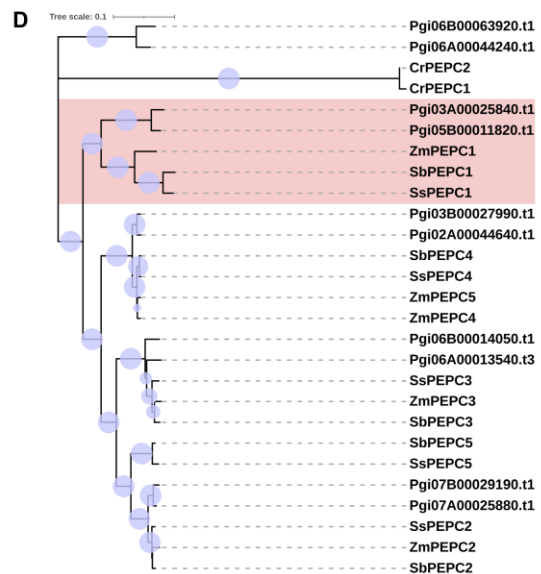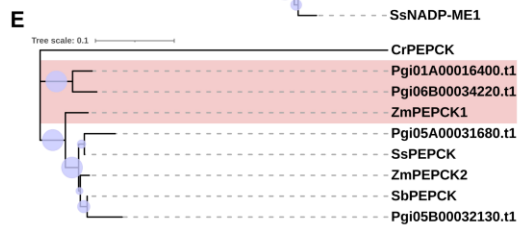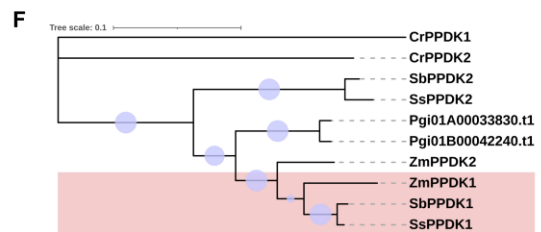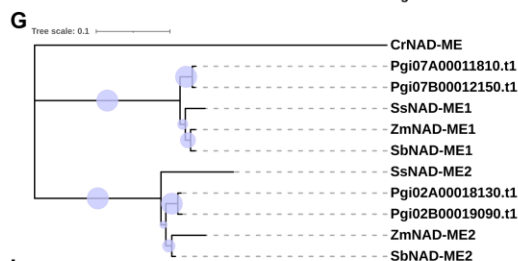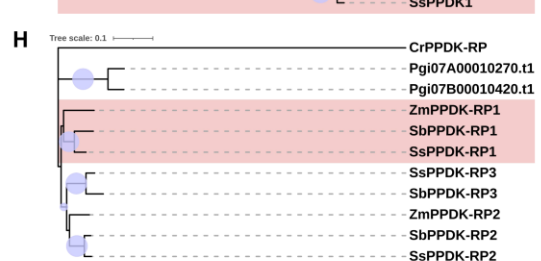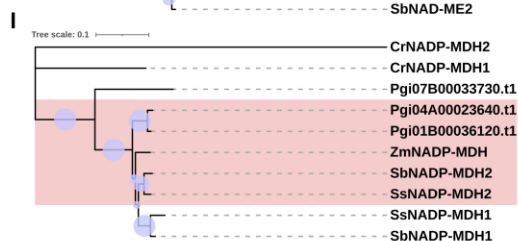

**Figure S16. Phylogenetic analysis of genes encoding C<sub>4</sub> enzymes and their non-C<sub>4</sub> isoforms.** Cf indicates *C. fungigraminus*, Ss indicates *Saccharum spontaneum*, Sb indicates *Sorghum bicolor*, Zm indicates *Zea mays*, Os indicates *Oryza sativa*, and Cr indicates *Chlamydomonas reinhardtii*. Purple circles indicate bootstraps. Genes in the pink clade encode proteins in the C<sub>4</sub> pathway. Tree scale: 0.1.

Phylogenetic analysis of CA **(A)**; PEPC-k **(B)**; NADP-ME **(C)**; PEPC **(D)**; PEPCK **(E)**; PPK (F); NAD-ME **(G)**; PPK-RP **(H)**; and NADP-MDH**(I)** proteins.

|               | root | stem | leaf |
|---------------|------|------|------|
| CfCA1_A       | 1    | 17   | 71   |
| CfCA1_B       | 11   | 28   | 196  |
| CfCA3_A       | 9    | 13   | 5    |
| CfCA3_B       | 8    | 51   | 9    |
| CfCA4_A       | 0    | 0    | 0    |
| CfNAD-ME1_A   | 4    | 3    | 3    |
| CfNAD-ME1_B   | 4    | 5    | 6    |
| CfNAD-ME2_A   | 3    | 3    | 2    |
| CfNAD-ME2_B   | 6    | 4    | 1    |
| CfNADP-MDH2_A | 0    | 13   | 34   |
| CfNADP-MDH2_B | 0    | 8    | 32   |
| CfNADP-MDH1_B | 0    | 8    | 34   |
| CfNADP-ME2_A  | 4    | 11   | 20   |
| CfNADP-ME2_B  | 4    | 16   | 34   |
| CfNADP-ME3_A  | 0    | 0    | 0    |
| CfNADP-ME3_B  | 0    | 0    | 0    |
| CfNADP-ME4_A  | 3    | 0    | 0    |
| CfNADP-ME4_B  | 8    | 3    | 0    |
| CfNADP-ME5_A  | 12   | 3    | 2    |
| CfNADP-ME5_B  | 15   | 13   | 20   |
| CfPEPC1_A     | 0    | 69   | 476  |
| CfPEPC1_B     | 0    | 137  | 769  |
| CfPEPC2_A     | 18   | 15   | 7    |
| CfPEPC2_B     | 67   | 38   | 38   |
| CfPEPC3_A     | 11   | 9    | 6    |
| CfPEPC3_B     | 17   | 13   | 23   |
| CfPEPC4_A     | 66   | 20   | 9    |
| CfPEPC4_B     | 63   | 23   | 16   |
| CfPEPC5_A     | 0    | 28   | 207  |
| CfPEPC5_B     | 0    | 0    | 15   |
| CfPEPC-k1_A   | 12   | 10   | 21   |
| CfPEPC-k1_B   | 14   | 36   | 21   |
| CfPEPC-k2_A   | 86   | 138  | 459  |
| CfPEPC-k2_B   | 39   | 36   | 159  |
| CfPEPC-k3_A   | 26   | 127  | 112  |
| CfPEPC-k3_B   | 50   | 145  | 100  |
| CfPPDK1_A     | 0    | 26   | 203  |
| CfPPDK1_B     | 0    | 25   | 252  |
| CfPPDK-RP1_A  | 2    | 19   | 79   |
| CfPPDK-RP1_B  | 7    | 68   | 236  |
| CfPEPCK1_A    | 0    | 1    | 43   |
| CfPEPCK1_B    | 1    | 1    | 8    |
| CfPEPCK2_A    | 8    | 1    | 0    |
| CfPEPCK2_B    | 5    | 1    | 2    |

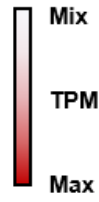

**Figure S17. Expression pattern of carbon fixation genes in root, stem and leaf tissue of JUJUNCAO.**

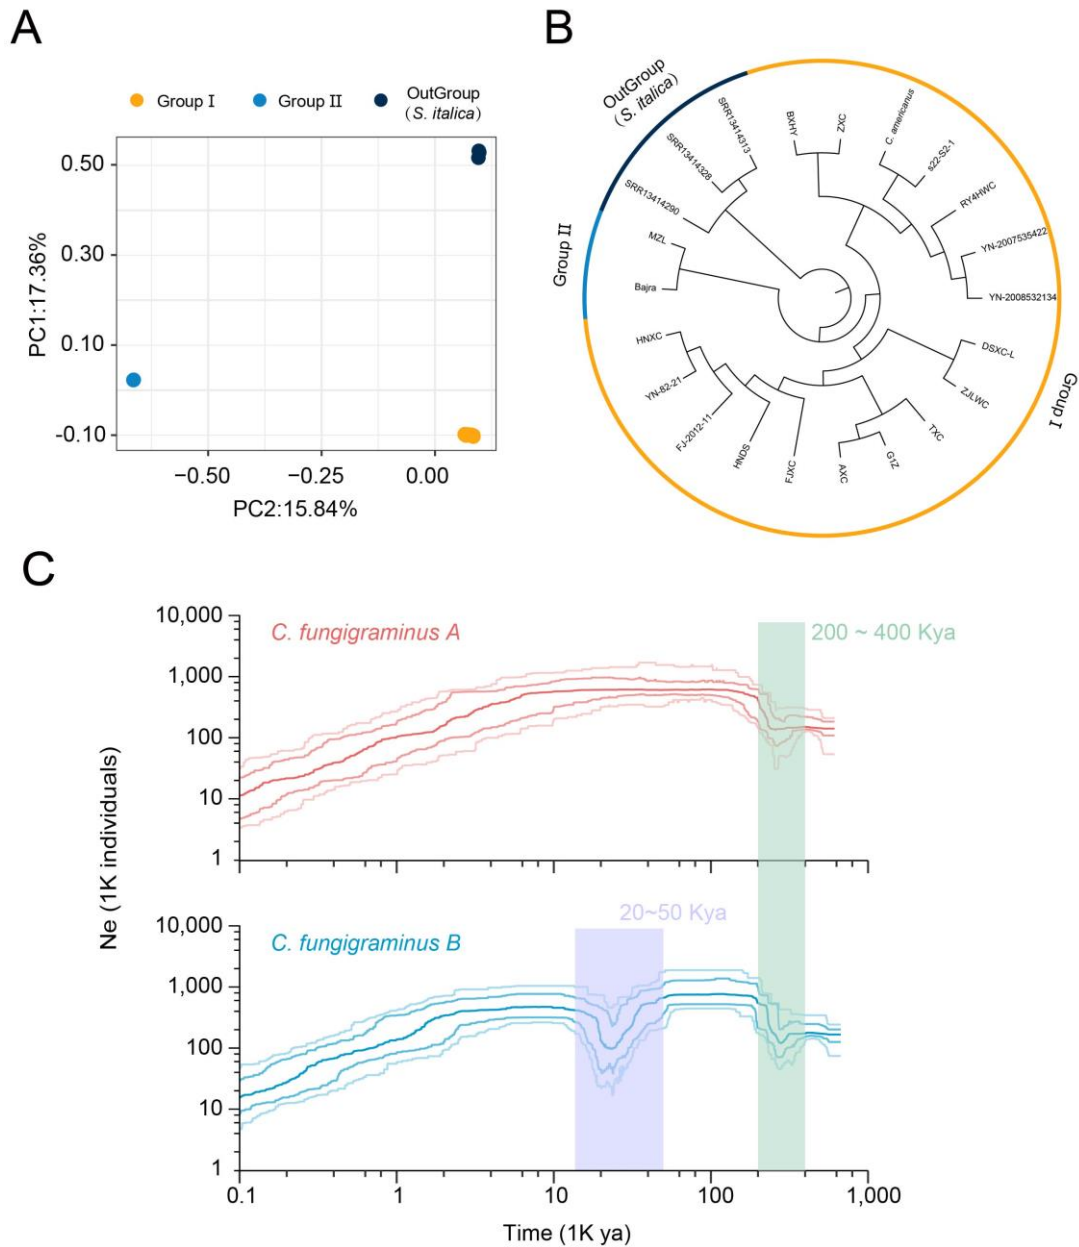

**Figure S18. Population characteristics and evolution of JUJUNCAO.**

**(A)** Principal component analysis with PC1 and PC2.

**(B)** The phylogenetic tree was constructed based on genome-wide SNP, with different colors representing different groups.

**(C)** Historical effective population sizes ( $N_e$ ) for *Cenchrus* population estimated using *C. fungigraminus A* and *B* as the ancestor genome. Nucleotide substitution rate  $\mu = 6.5e-9$  and generation time  $gt = 1$  were used for analysis.

**Table S1. Estimation of the JUJUNCAO genome using flow cytometry**

| <b>Sample</b> | <b>Reference (Ref)</b> | <b>Signal of Ref</b> | <b>Signal of Sample</b> | <b>Ratio</b> | <b>Estimated Genome size (Gb)</b> |
|---------------|------------------------|----------------------|-------------------------|--------------|-----------------------------------|
| JUJUNCAO-1    | Tomato                 | 24.72                | 58.76                   | 2.38         | 2.09                              |
| JUJUNCAO-2    | Tomato                 | 25.23                | 59.86                   | 2.37         | 2.09                              |
| JUJUNCAO-3    | Tomato                 | 25.25                | 58.81                   | 2.33         | 2.05                              |

**Table S2. Statistics of Hi-C mapping of the JJJUNCAO genome**

| <b>Statistics of mapping</b>                    |             |
|-------------------------------------------------|-------------|
| Clean Paired-end Reads                          | 815,147,702 |
| Clean Paired-end Reads Rates (%)                | 100%        |
| Unmapped Paired-end Reads                       | 58,095,120  |
| Unmapped Paired-end Reads Rates                 | 7.12%       |
| Paired-end Reads with singleton                 | 293,148,296 |
| Paired-end Reads with singleton Rates (%)       | 35.96%      |
| Multi Paired-end Reads                          | 0           |
| Multi Paired-end Reads Rates                    | 0.00%       |
| Unique Paired-end Reads                         | 222,332,443 |
| Unique Paired-end Reads Rates (%)               | 27.27%      |
| <b>Statistics of valid reads</b>                |             |
| Unique Paired-end Reads                         | 222,332,443 |
| Dangling End Paired-end Reads                   | 35,538,486  |
| Dangling End Paired-end Reads Rates (%)         | 15.98%      |
| Self Circle Paired-end Reads                    | 67,508      |
| Self Circle Paired-end Reads Rates (%)          | 0.03%       |
| Dumped Paired-end Reads                         | 12,745      |
| Dumped Paired-end Reads Rates (%)               | 0.01%       |
| Valid interaction Paired-end Reads              | 174,777,070 |
| Valid interaction Paired-end Reads Rate (%)     | 78.61%      |
| Lib Valid interaction Paired-end Reads          | 166,760,242 |
| Lib Valid interaction Paired-end Reads Rate (%) | 75.00%      |
| Lib Dup (%)                                     | 25.00%      |

**Table S3. BUSCO analysis of the completeness of the *C. fungigraminus* genome.**

| <b>Description</b>                 | <b>Number</b> | <b>Percentage</b> |
|------------------------------------|---------------|-------------------|
| <b>Complete BUSCOs (C)</b>         | <b>1588</b>   | <b>98.4%</b>      |
| <b>single-copy BUSCOs (S)</b>      | <b>322</b>    | <b>20.0%</b>      |
| <b>duplicated BUSCOs (D)</b>       | <b>1266</b>   | <b>78.4%</b>      |
| <b>Fragmented BUSCOs (F)</b>       | <b>7</b>      | <b>0.4%</b>       |
| <b>Missing BUSCOs (M)</b>          | <b>17</b>     | <b>1.2%</b>       |
| <b>Total BUSCO groups searched</b> | <b>1614</b>   | <b>100.0%</b>     |



**Table S4. Summary of assembly, and annotation statistics for four *Cenchrus* Species**

| <b>Species</b>                | <b><i>C. fungigraminus</i></b> | <b><i>C. americanus</i></b> | <b><i>C. purpureus</i> cv. <i>Purple</i></b> | <b><i>P. purpureus</i></b> |
|-------------------------------|--------------------------------|-----------------------------|----------------------------------------------|----------------------------|
| Ploidy                        | 2n=4x=28                       | 2n=2x=14                    | 2n=4x=28                                     | 2n=4x=28                   |
| Assembly size (Gb)            | 1.98                           | 1.58                        | 1.97                                         | 2.07                       |
| Number of contig              | 815                            | 208,873                     | 2,059                                        | 1956                       |
| Contig N50 (bp)               | 134,074,806                    | 18,180                      | 1,829,308                                    | 2,900,000                  |
| Longest contig (bp)           | 162,376,048                    | 282,900                     | 15,071,384                                   | 20,190,000                 |
| BUSCO assessment              | 98.40%                         | -                           | 97.83%                                       | 97.80%                     |
| Percentage of repeat elements | 73.38%                         | 77.2%                       | 66.32%                                       | 60.47%                     |
| GC content                    | 47.11%                         | 47.90%                      | 46.95%                                       | 46.95                      |

**Table S5. BUSCO analysis of the annotation of the *C. fungigraminus* genome.**

| <b>Description</b>                 | <b>Number</b> | <b>Percentage</b> |
|------------------------------------|---------------|-------------------|
| <b>Complete BUSCOs (C)</b>         | <b>1501</b>   | <b>93.0%</b>      |
| <b>single-copy BUSCOs (S)</b>      | <b>212</b>    | <b>13.1%</b>      |
| <b>duplicated BUSCOs (D)</b>       | <b>1289</b>   | <b>79.9%</b>      |
| <b>Fragmented BUSCOs (F)</b>       | <b>10</b>     | <b>0.6%</b>       |
| <b>Missing BUSCOs (M)</b>          | <b>103</b>    | <b>6.4%</b>       |
| <b>Total BUSCO groups searched</b> | <b>1614</b>   | <b>100.0%</b>     |

**Table S6. Repeat contents of JUJUNCAO were compared with other grass species**

|                        | <i>Z.mays</i> | <i>S.italica</i> | <i>P.<br/>miliaceum</i> | <i>S.bicolor</i> | <i>C. fungigraminus</i> |                  |                  |
|------------------------|---------------|------------------|-------------------------|------------------|-------------------------|------------------|------------------|
|                        |               |                  |                         |                  | <i>AB</i>               | <i>Sub<br/>A</i> | <i>Sub<br/>B</i> |
| Total Repeat Fractions | 81.75         | 48.63            | 55.08                   | 69.67            | 68.87                   | 66.39            | 70.75            |
| Class I :              | 52.50         | 18.56            | 23.35                   | 45.59            | 35.69                   | 33.14            | 38.45            |
| Retrotransposon        |               |                  |                         |                  |                         |                  |                  |
| LTR                    |               |                  |                         |                  |                         |                  |                  |
| Retrotransposon        |               |                  |                         |                  |                         |                  |                  |
| Ty3/Gypsy              | 31.98         | 11.60            | 19.07                   | 38.78            | 22.40                   | 19.33            | 25.37            |
| Ty1/Copia              | 19.86         | 5.31             | 3.26                    | 5.70             | 11.25                   | 11.92            | 10.86            |
| Other                  | 0             | 0.07             | 0.04                    | 0.18             | 0.26                    | 0.23             | 0.3              |
| Non-LTR                |               |                  |                         |                  |                         |                  |                  |
| Retrotransposon        |               |                  |                         |                  |                         |                  |                  |
| LINE                   | 0.66          | 1.58             | 0.98                    | 0.93             | 1.78                    | 1.66             | 1.92             |
| SINE                   | 0             | 0                | 0                       | 0                | 0                       | 0                | 0                |
| Class II :             | 2.43          | 5.47             | 1.99                    | 8.68             | 4.51                    | 4.25             | 4.79             |
| DNA transposon         |               |                  |                         |                  |                         |                  |                  |
| CACTA                  | 1.58          | 3.37             | 1.21                    | 3.56             | 2.73                    | 2.60             | 2.89             |
| Mutator                | 0.32          | 0.79             | 0.29                    | 0.68             | 1.27                    | 1.14             | 1.40             |
| hAT                    | 0.19          | 0.53             | 0.23                    | 0.51             | 0.22                    | 0.23             | 0.2              |
| PIF/Harbinger          | 0.18          | 0.56             | 0.06                    | 2.79             | 0.14                    | 0.13             | 0.15             |
| Helitron               | 0.16          | 0.18             | 0.20                    | 0.28             | 0.14                    | 0.14             | 0.14             |
| TcMar-                 |               |                  |                         |                  |                         |                  |                  |
| Stowaway               | 0             | 0.04             | 0                       | 0                | 0.01                    | 0.01             | 0.01             |
| Other                  | 0             | 0                | 0                       | 0.86             | 0                       | 0                | 0                |
| Tandem Repeat          | 0             | 0                | 0                       | 2.56             | 0                       | 0                | 0                |
| Unknown                | 26.82         | 24.60            | 29.74                   | 4.46             | 28.67                   | 29.00            | 27.51            |

**Table S7. The centromeric repeats identified from JUJUNCAO genome**

| <b>Chr</b> | <b>Start</b> | <b>End</b> | <b>Length (bp)</b> | <b>Monomer</b>        |
|------------|--------------|------------|--------------------|-----------------------|
| Chr01A     | 18,253,776   | 19,139,182 | 885,406            | <i>CEN156</i>         |
| Chr01A     | 75,007,454   | 95,409,560 | 20,402,106         | <i>CEN137, CEN156</i> |
| Chr01B     | 75,121,515   | 98,234,246 | 23,112,731         | <i>CEN156</i>         |
| Chr02A     | 79,096,377   | 86,197,020 | 7,100,643          | <i>CEN137</i>         |
| Chr02B     | 68,090,932   | 76,337,386 | 8,246,454          | <i>CEN156</i>         |
| Chr03A     | 40,718,343   | 61,191,030 | 20,472,687         | <i>CEN137, CEN156</i> |
| Chr03B     | 73,050,604   | 78,621,099 | 5,570,495          | <i>CEN156</i>         |
| Chr04A     | 80,088,409   | 83,465,161 | 3,376,752          | <i>CEN137</i>         |
| Chr04B     | 32,009,996   | 35,621,487 | 3,611,491          | <i>CEN156</i>         |
| Chr05A     | 24,377,613   | 36,892,929 | 12,515,316         | <i>CEN137, CEN156</i> |
| Chr05A     | 45,359,011   | 46,301,987 | 942,976            | <i>CEN137</i>         |
| Chr05B     | 52,902,785   | 63,299,058 | 10,396,273         | <i>CEN148, CEN156</i> |
| Chr06A     | 55,670,148   | 61,016,392 | 5,346,244          | <i>CEN156</i>         |
| Chr06B     | 79,034,047   | 84,664,505 | 5,630,458          | <i>CEN156</i>         |
| Chr07A     | 51,781,816   | 62,044,859 | 10,263,043         | <i>CEN137, CEN156</i> |
| Chr07B     | 76,324,440   | 87,934,803 | 11,610,363         | <i>CEN156</i>         |

**Table S8. Depth of the cytosine among three sequence contexts**

| <b>Tissue</b> | <b>Depth of all CpG</b> | <b>Depth of all CHG</b> | <b>Depth of all CHH</b> |
|---------------|-------------------------|-------------------------|-------------------------|
| Leaf          | 16.9217                 | 18.3554                 | 19.0562                 |
| Stem          | 16.9264                 | 18.4428                 | 19.1824                 |
| Root          | 15.1407                 | 16.2506                 | 17.3339                 |

**Table S9. The comparison and de-repetition of BS-seq**

| <b>Tissue</b> | <b>Mapping efficiency (%)</b> | <b>De-repetition retention rate (%)</b> |
|---------------|-------------------------------|-----------------------------------------|
| Leaf          | 69.60                         | 74.46                                   |
| Stem          | 68.70                         | 75.09                                   |
| Root          | 63.60                         | 75.63                                   |

**Table S10. Methylation information of the three tissue**

---

| <b>Tissue</b> | <b>methC of all CpG (%)</b> | <b>methC of all CHG (%)</b> | <b>methC of all CHH (%)</b> |
|---------------|-----------------------------|-----------------------------|-----------------------------|
| Leaf          | 63                          | 44.3                        | 2.1                         |
| Stem          | 63.5                        | 47.2                        | 2.3                         |
| Root          | 73.3                        | 53                          | 2.4                         |

---

**Table S11. Members of the C<sub>4</sub> related gene**

| <b>Name</b>                              | <b>Gene ID</b> | <b>Abbreviation ID</b> |
|------------------------------------------|----------------|------------------------|
|                                          | Pgi06A00020610 | CfCA1_A                |
|                                          | Pgi06B00021460 | CfCA1_B                |
| <b>Carbonic anhydrase</b>                | Pgi06A00020600 | CfCA3_A                |
|                                          | Pgi06B00021450 | CfCA3_B                |
|                                          | Pgi06A00020590 | CfCA4_A                |
|                                          | Pgi07A00011810 | CfNAD-ME1_A            |
| <b>NAD-malic enzyme</b>                  | Pgi07B00012150 | CfNAD-ME1_B            |
|                                          | Pgi02A00018130 | CfNAD-ME2_A            |
|                                          | Pgi02B00019090 | CfNAD-ME2_B            |
|                                          | Pgi04A00023640 | CfNADP-MDH2_A          |
| <b>NADP-malate dehydrogenase</b>         | Pgi01B00036120 | CfNADP-MDH2_B          |
|                                          | Pgi07B00033730 | CfNADP-MDH1_B          |
|                                          | Pgi06A00043020 | CfNADP-ME2_A           |
|                                          | Pgi06B00062300 | CfNADP-ME2_B           |
|                                          | Pgi06A00014490 | CfNADP-ME3_A           |
| <b>NADP-malic enzyme</b>                 | Pgi06B00015040 | CfNADP-ME3_B           |
|                                          | Pgi01A00046050 | CfNADP-ME4_A           |
|                                          | Pgi01B00054310 | CfNADP-ME4_B           |
|                                          | Pgi06A00015390 | CfNADP-ME5_A           |
|                                          | Pgi06B00016120 | CfNADP-ME5_B           |
|                                          | Pgi03A00025840 | CfPEPC1_A              |
|                                          | Pgi05B00011820 | CfPEPC1_B              |
|                                          | Pgi07A00025880 | CfPEPC2_A              |
|                                          | Pgi07B00029190 | CfPEPC2_B              |
| <b>Phosphoenolpyruvate carboxylase</b>   | Pgi06A00013540 | CfPEPC3_A              |
|                                          | Pgi06B00014050 | CfPEPC3_B              |
|                                          | Pgi02A00044640 | CfPEPC4_A              |
|                                          | Pgi03B00027990 | CfPEPC4_B              |
|                                          | Pgi06A00044240 | CfPEPC5_A              |
|                                          | Pgi06B00063920 | CfPEPC5_B              |
|                                          | Pgi03A00001940 | CfPEPC-k1_A            |
|                                          | Pgi03B00001900 | CfPEPC-k1_B            |
| <b>PEPC kinase</b>                       | Pgi03A00013120 | CfPEPC-k2_A            |
|                                          | Pgi03B00013070 | CfPEPC-k2_B            |
|                                          | Pgi03A00039540 | CfPEPC-k3_A            |
|                                          | Pgi04B00016760 | CfPEPC-k3_B            |
|                                          | Pgi01A00033830 | CfPPDK1_A              |
| <b>Pyruvate orthophosphate dikinase</b>  | Pgi01B00042240 | CfPPDK1_B              |
|                                          | Pgi07A00010270 | CfPPDK-RP_A            |
| <b>PPDK regulatory protein</b>           | Pgi07B00010420 | CfPPDK-RP_B            |
| <b>Phosphoenolpyruvate carboxykinase</b> | Pgi01A00016400 | CfPEPCK1_A             |



|                                                   |                |            |
|---------------------------------------------------|----------------|------------|
|                                                   | Pgi06B00034220 | CfPEPCK1_B |
|                                                   | Pgi05A00031680 | CfPEPCK2_A |
|                                                   | Pgi05B00032130 | CfPEPCK2_B |
| <b>Aspartate transaminase</b>                     | Pgi03A00002400 | CfAspAT_A  |
|                                                   | Pgi03B00002380 | CfAspAT_B  |
| <b>Alanine transaminase</b>                       | Pgi02A00024740 | CfAlaAT_A  |
|                                                   | Pgi02B00025890 | CfAlaAT_B  |
| <b>Probable sodium/metabolite cotransporter 2</b> | Pgi06A00020290 | CfBASS2_A  |
|                                                   | Pgi06B00021230 | CfBASS2_B  |
| <b>2-oxoglutarate/malate transporter 1</b>        | Pgi04A00009500 | CfOMT1_A   |
|                                                   | Pgi01B00009320 | CfOMT1_B   |
| <b>Dicarboxylate transporter 2</b>                | Pgi04A00029510 | CfDiT2_A   |
|                                                   | Pgi01B00029590 | CfDiT2_B   |
| <b>Triose/phosphate transmembrane antiporter</b>  | Pgi01A00026190 | CfPPT_A    |
|                                                   | Pgi01B00023890 | CfPPT_B    |
| <b>Sodium/proton antiporter 1</b>                 | Pgi07A00029340 | CfNHD1_A   |
|                                                   | Pgi07B00032820 | CfNHD1_B   |

---

**Table S12. Quality control and mapping statistics of resequencing data**

| genus<br>names    | sample                                   | clean reads | Clean Base (bp) | GC Content<br>(%) | Mapping rate |        |        |
|-------------------|------------------------------------------|-------------|-----------------|-------------------|--------------|--------|--------|
|                   |                                          |             |                 |                   | Sub A        | Sub B  | AB     |
| <i>Pennisetum</i> | YN-2007535422                            | 156,605,216 | 23,490,782,400  | 47                | 72.70%       | 80.45% | 98.01% |
| <i>Pennisetum</i> | YN-2008532134                            | 150,295,676 | 22,544,351,400  | 47                | 72.53%       | 80.24% | 97.92% |
| <i>Pennisetum</i> | RY4HWC                                   | 219,117,450 | 32,867,617,500  | 47                | 72.18%       | 79.90% | 97.68% |
| <i>Cenchrus</i>   | <i>Cenchrus fungigraminus</i> (JUJUNCAO) | 35,610,000  | 5,341,500,000   | 47                | 71.02%       | 79.05% | 97.63% |
| <i>Pennisetum</i> | G1Z                                      | 253,614,512 | 38,042,176,800  | 47                | 70.74%       | 78.39% | 95.66% |
| <i>Pennisetum</i> | BXHY                                     | 146,492,930 | 21,973,939,500  | 47                | 70.88%       | 78.95% | 95.60% |
| <i>Pennisetum</i> | ZXC                                      | 251,433,182 | 37,714,977,300  | 46                | 70.71%       | 78.80% | 95.45% |
| <i>Pennisetum</i> | DSXC-L                                   | 229,195,698 | 34,379,354,700  | 47                | 70.57%       | 78.83% | 95.40% |
| <i>Pennisetum</i> | ZJLWC                                    | 216,187,006 | 32,428,050,900  | 47                | 70.28%       | 78.67% | 95.06% |
| <i>Pennisetum</i> | FJXC                                     | 159,663,548 | 23,949,532,200  | 47                | 69.17%       | 77.60% | 93.78% |
| <i>Pennisetum</i> | YN-82-21                                 | 158,911,116 | 23,836,667,400  | 47                | 69.32%       | 77.49% | 93.74% |
| <i>Pennisetum</i> | HNXC                                     | 248,139,874 | 37,220,981,100  | 47                | 68.99%       | 77.49% | 93.58% |
| <i>Pennisetum</i> | TXC                                      | 258,405,408 | 38,760,811,200  | 46                | 68.96%       | 77.51% | 93.55% |
| <i>Pennisetum</i> | FJ-2012-11                               | 144,233,242 | 21,634,986,300  | 47                | 69.01%       | 77.37% | 93.53% |
| <i>Pennisetum</i> | HNDS                                     | 205,998,212 | 30,899,731,800  | 47                | 68.48%       | 76.75% | 92.70% |
| <i>Pennisetum</i> | AXC                                      | 225,487,608 | 33,823,141,200  | 47                | 67.87%       | 76.33% | 91.89% |
| <i>Cenchrus</i>   | Bajra                                    | 227,346,622 | 34,101,993,300  | 48                | 72.69%       | 48.43% | 74.41% |
| <i>Pennisetum</i> | s22-S2-1                                 | 50,240,552  | 7,536,082,800   | 54                | 62.48%       | 62.38% | 73.48% |
| <i>Pennisetum</i> | MZL                                      | 265,395,788 | 39,809,368,200  | 48                | 71.90%       | 47.05% | 73.35% |
| <i>Setaria</i>    | SRR13414328                              | 76,141,500  | 11,421,225,000  | 46                | 9.16%        | 8.72%  | 18.25% |
| <i>Setaria</i>    | SRR13414313                              | 81,423,842  | 12,213,576,300  | 47                | 14.14%       | 14.67% | 16.95% |
| <i>Setaria</i>    | SRR13414290                              | 81,800,876  | 12,270,131,400  | 45                | 13.49%       | 14.16% | 15.83% |

**Table S13. Sequence of probes for the three centromeric satellite repeats**

| <b>Repeat</b>        | <b>Oligomer sequence</b>       |
|----------------------|--------------------------------|
| <b><i>CEN137</i></b> | ATTCGGGGTACCAAAGTTGTGAAGCATCC  |
| <b><i>CEN148</i></b> | ACCTTCGGCATGTAAATAACTTGTGTTTCG |
| <b><i>CEN156</i></b> | TTGCGAAAATGGTTTCGCAACAAAACATCC |
